# Supplementary material for: Models of buoyancy-driven dykes using continuum plasticity and fracture mechanics: a comparison
Source: Copernicus journal article supplement (doi:10.5194/egusphere-2024-3504), 2024-12-05
Supplement: Supplementary file [file egusphere-2024-3504-AC2-supplement.pdf]

# Manuscript “Models of buoyancy-driven dykes using continuum plasticity and fracture mechanics: a comparison” – Response to RC1

We are grateful for this thorough review. As the reviewer correctly noted, there were three typos: the omission of the factor of  $1/3$  in front of the isotropic strain rate components in Equations D2 and D4, and an incorrect expression,  $\Delta P = P^l - P^s$ , on the line below Equation C5, which should have been  $\Delta P = P^s - P^l$ . We have corrected these errors in the revision (the code implementation was correct in the first instance).

Many of the other comments appear to stem from a misunderstanding of the scope of this manuscript. This manuscript has one specific and limited aim: to compare the poro-VEVP model, published in Li et al. (2023), against the classical LEFM model for a buoyancy-driven dyke. To best focus on this key purpose, we made the following choices:

- (i) We do not review in detail other models that include plasticity into a poro-(visco)elastic framework.
- (ii) For consistency with Li et al. (2023), we use the same terminology and notations.
- (iii) To avoid repetition, we omit mathematical details explained in Li et al. (2023), and recapitulate only the key elements of the mathematical model in the Appendices.

Regarding (i): reviewing other plastic models (except for those used to simulate dyking) is beyond the scope of this manuscript. Therefore, we initially kept the literature review brief, covering only the most relevant studies. In response to the review and to better connect our ideas with related ones, we have incorporated some of the suggested references where appropriate. However, we do not discuss them in detail to avoid distraction.

Regarding (ii) and (iii), the reviewer has made valuable suggestions and highlighted places where different approaches have led to different notations. However, it is not our aim to address these broad issues in the literature. We feel that the current formalism and notation best serves our admittedly narrow aims and maintains consistency with our closely related paper. Readers seeking to understand the workings of the poro-VEVP model are encouraged to read Li et al. (2023).

The remainder of this response is organised into two sections based on the type of response. In the next section, we discuss revisions to improve the manuscript; in the section after that we provide further clarifications for the reviewer.

## 1 Revise manuscript for improvement

- Line 12. “Magmatic dykes, formed by fluid-driven fracture, are important pathways for magma ascent across the lithosphere.” This is just one of the hypotheses; correct the sentence and cite other possible mechanisms.

**R:** This sentence is not incorrect. Certainly we agree that there are other possible mechanisms. However, reviewing all possible mechanisms does not serve the aims of this manuscript. We rephrase the sentence as “Magmatic dykes, formed by fluid-driven fracture, are an important pathway for magma ascent across the lithosphere.” This more clearly indicates that they are one mechanism out of a larger set.

- Line 105. This equation is not standard, give explanations.

**R:** This equation is a slight modification of the standard formulation in the LEFM model. We added further explanation in Line 111: “Note that Eq. (2) adapts the standard LEFM elastic stress formulation (e.g., Lister (1990)) to account for porosity effects on solid deformation.”

- Lines 169-170. “This approach only changes how the stress-balance equation is linked with the plastic yield condition, without altering either of the two physics.” Explanation is confusing at best. I do not see how physics stays the same.

**R:** We removed this sentence to avoid confusion. The phrase ‘without altering either of the two physics’ was intended to clarify that neither the stress-balance equation nor the plastic yield condition was changed. Evidently, it was not clarifying.

- Line 209. Since you do not provide your rheology equations where  $G$  and  $Z$  are parameters, it is useless to provide these expressions here.

**R:** We moved the expressions for  $G_\phi$  and  $Z_\phi$  to Table 1, and rephrased the paragraph in Lines 208–210 as “The elastic shear ( $G_\phi$ ) and bulk ( $Z_\phi$ ) moduli follow porosity-dependent relations, as shown in Table 1. Note that ...”.

- Line 220. It would be helpful with the 2D figure illustrating the initial distribution of porosity.

**R:** We will upload an animation of the porosity field evolution to illustrate dyke propagation. This animation will demonstrate the initial porosity distribution.

- Line 292. “the tip advances approximately the same distance in each 0.4 kyr interval” Why? Discuss mechanisms and reasons for such behavior.

**R:** This is certainly an interesting question. A constant propagation speed is a result of stresses reaching an equilibrium and steady state in a reference frame moving at the speed of the tip. Constant speed is essential for a valid comparison with the LEFM model. However, we do not fully understand the mechanisms responsible for this equilibrium. Our approach was to configure the boundary conditions of the poro-VEVP model to mimic a buoyancy-driven dyke in the LEFM model. In the LEFM model, stress equilibrium is assumed, resulting in constant-speed dyke propagation. In the poro-VEVP model, equilibrium is achieved as a result of the boundary conditions and domain configuration.

To clarify this in the manuscript, following this sentence, we added: ‘It implies that a stress equilibrium has been achieved, which is consistent with the assumptions of the LEFM model’.

- Lines 372-373. “The dyke width is determined by the grid size, which is a limitation of the present discretized solutions of the continuum models.” Discuss these limitations and ways to overcome them. The problem of mesh dependency and respective regularization is widely discussed in the geodynamic community (e.g., Duretz et al., 2023).

**R:** We have added a section to the Appendix discussing mesh dependency and refer to this new section for details. We carefully considered the Duretz regularisation in our previous work. While that regularisation works well for shear failure, it appears to be inadequate for tensile failure. This is an important issue, but one that we do not currently know how to resolve.

- Lines 539-541. “For generality...” Equations (C9) are not general. Where do they come from?

**R:** We change “For generality, we still keep the Maxwell shear and bulk viscous terms and its porosity-dependent relation in the computational framework” to read “Although the models in this paper are dominantly elastic and plastic, we retain viscosity in our formulation for generality. We employ the following porosity-dependent relationships for the Maxwell shear and bulk viscosity,”.

## 2 Further clarification to the reviewer

- “First, they had to introduce a strong anisotropy of permeability inside a channel they produced, and the flow was essentially driven by buoyancy and this anisotropy. Thus, dyke always follows the direction of the anisotropy. However, most of the rocks have higher permeability in the horizontal direction, and the planes of weakness of anisotropic rocks are also in the horizontal direction. Thus, this argument would be more suitable to simulate sills. In reality, sills and dykes often accompany each other forming interconnected plumbing systems. ”

**R:** We wish to clarify two points of misunderstanding. First, we did introduce a strong anisotropy of permeability; however, this was designed to reduce lateral fluid leakage from the dyke, leading to a better match with the LEFM model. It does not drive the flow, and its direction is a result of the PDEs, not a prescribed parameter (noting, however, that in this manuscript we only allow the direction being either horizontal or vertical). Second, we did not model the background anisotropic permeability of sedimentary rocks, although this is certainly an interesting topic. This

manuscript focuses on comparing two theoretical models and therefore employs the simplest possible geological features.

- “Second, they “prescribe” dyke by setting the initial elevated porosity region at the bottom of their computational domain prescribed by anisotropic Gaussian porosity distribution.”

**R:** We did not prescribe a dyke; rather, dykes emerge as a feature of the numerical solutions of the PDEs. Any initial porosity distribution could lead to one or more similar dykes. However, we chose this particular initial distribution to promote a convenient comparison with the LEFM dyke, which is the focus of this manuscript.

- “And third, the width of their dyke is one grid size. This would suggest that at higher resolution, their dyke will be an infinitely thin line. In reality, dykes always have a finite length, sometimes meters. ”

**R:** We are aware of the limitation that the dyke width is determined by the grid size. This limitation was previously discussed only in the Discussion section. In the revision, we also further discuss grid dependency in a new appendix (Appendix E).

- Lines 71-74. “Isotropic permeability within the poro-VEVP dyke promotes widening by horizontal porous flow, a behaviour not associated with real (or LEFM) dykes. We resolve this discrepancy by introducing an anisotropic permeability tensor into the poro-VEVP model to limit leakage and enhance fracture propagation...” Discuss other possible reasons for not reproducing dyke. For example, an underpressure at the fracture tip generated at the moment of fracture opening can be a driving force for the flow. Fracture opening must be must faster process than Darcy flow, and thus, there would be a region with undrained conditions at the tip where pore volume is increased due to fracture generation that would lead to the pressure drop at the tip, increasing pressure gradient and thus the flow.

**R:** Other factors may contribute to the widening of the poro-VEVP dyke over time. However, identifying one solution to this issue is sufficient for the purpose of this manuscript. This comment suggests an interesting alternative, which, however, requires examination in future work.

- Line 108. Why do you assume fluid pressure is equal to solid pressure? Further in the text you assume that  $p^l = \text{const}$  and arrive at equation (5), while  $p^s$  given by equations (2) and (3) is not constant. These two assumptions are not consistent.

**R:** Here  $p^l = p^s$  assumes stress balance between the liquid and solid. This is a common assumption in the LEFM model and does not lead to the violation suggested by the reviewer. Equation (2) is the equation for the solid elastic stress. Equation (3) is the fracture criterion at the tip. A constant  $p^l$  or  $p^s$  at the far field is a boundary condition. Eq (2) is consistent with this boundary condition when  $\partial\phi h/\partial z = 0$  at

the far field, which implies a constant-width or constant-porosity assumption at the far field. A dyke with a constant width (porosity) at the far field is the case that we use to compare the LEFM and poro-VEVP model in this manuscript.

- Line 147. Equation (6) and the corresponding equation in the Appendix have a wrong gravity term. The conservation of total momentum has a total density in the gravity term (Bercovici et al., 2001; Yarushina and Podladchikov, 2015).

**R:** The gravity term here, and the corresponding equation in Appendix C (equation C1), is correct. This term,  $-\phi\Delta\rho\mathbf{g}$ , is derived by subtracting a gradient of static pressure associated with the solid phase,  $\rho^s\mathbf{g}$ , from the gravity term with a total density,  $\bar{\rho}\mathbf{g}$ . Correspondingly, the pressure term becomes  $p^l$  representing the dynamic liquid pressure, consistent with the definition in section 2.1. This formulation is used in many references cited by this manuscript, and is consistent with the formulation suggested by the reviewer (i.e., Bercovici et al., 2001; Yarushina and Podladchikov, 2015).

- Line 248. “Appendix D provides details of the formulation for each local work rate.” Incorrect. You provide this estimation only for one in the appendix.

**R:** We explain the details of each mechanism up to the last step. For the last step, we use the plastic work rate as an example to show the final expression. We expect that readers can work out the similar expressions for viscous and elastic components without difficulty.

- Line 260. Why propagation speed is assumed constant?

**R:** This is the case we simulate in both the poro-VEVP and LEFM models to compare them. While Equation (19) could certainly be generalized to accommodate a variable speed, such an extension is beyond the scope of this manuscript.

- Line 296-299. The 2D figure of plastic failure around the tip would help in understanding. You are referring everywhere in the text that your dyke is generated by mode I fracture. How can you be sure that it is mode I and not mode II mode, given that your yield criterion contains both? This statement needs further proof and illustration. Are there any shear stresses associated with dyke propagation?

**R:** The LEFM solution to which we compare is a mode-I solution. In Li et al. (2023), we demonstrated quantitative agreement between this type of tensile failure and mode-I fracture in LEFM theory by comparing the stress field around the tip. In this manuscript, we further support this agreement by recognising the equivalence between the mode-I fracture energy in the LEFM model and the plastic-dissipation energy in the poro-VEVP model. However, we agree that completely isolating mode-I and mode-II fractures is impossible because the yield criterion incorporates both shear and compaction stresses. Distinguishing between shear and tensile failure is

not truly feasible when using a smooth yield surface. Energetically, both modes contribute to the total plastic dissipation. Currently, we continue to use the definition from our previous work, where plastic failure associated with negative  $\Delta P$  is categorised as tensile failure.

- Lines 418-422. Maybe anisotropy is not the right mechanism? The results do not look convincing.

**R:** We apologise for being unable to address this comment fully due to its lack of detail. It does not specify which results are unconvincing or the reasons why. Lines 418-422 only discuss the limitations of the specific form of anisotropic permeability chosen for this manuscript.

- Line 526. What is overpressure and dilatancy pressure here? Consider using conventional terminology. You already used equation B5 when deriving C1 from (6). You need a separate independent equation for it.

**R:** Overpressure is a commonly used name for  $\Delta P$ . Dilatancy pressure  $\Delta P_{dl}$  is a new term introduced in a new formulation for  $\Delta P$ , presented in Eq. (8). It represents a correction term for compaction stress due to dilatancy after plastic failure. We believe this terminology is clear and should not cause confusion.

Our system of equation is mathematically consistent and presents no issue as suggested by this comment. This approach is similar to the conventional effective viscosity approach, but replacing the parameter  $\zeta_{\text{eff}}$  with  $\Delta P_{dl}$ . For details on the effective viscosity approach, we suggest to read Appendix D in Li et al. (2023) and references therein.

- Lines 551-552. “The local work rate associated with deformation at a point can be expressed as the product of the strain rates and effective stresses causing the deformation (Batchelor, 2000; Katz, 2022).” The concept of work rate is much more fundamental and dates much earlier than 2000 or 2022. Consider more appropriate references here.

**R:** These references are not intended to acknowledge the original source; indeed, this concept is fundamental to continuum mechanics. We cite two books here: Batchelor’s as a classic textbook on fundamental fluid dynamics, and Katz’s, to connect this concept to the two-phase geodynamic contexts.

- Line 570-576. Equations (D7) and (D8) need further explanations. You assumed that for viscoplastic stresses. However, this is not what is written as a viscoplastic constitutive equation (C7). Provide the proper derivation.

**R:** We believe that Equations (D7) and (D8) are sufficiently explained in the context. This comment suggests that the reviewer interprets  $\eta^K \dot{\epsilon}$  as representing the

total viscoplastic stresses; however, this term represents only the stress for the Kelvin(viscoplastic) viscous component. We clarified the meaning of the two terms in Equation (D7). Readers are expected to understand that each Kelvin component in a viscoplastic material experiences different stresses but identical strain rates.
